# Supplementary material for: Jahn–Teller distortions in transition metal compounds, and their importance in functional molecular and inorganic materials
Source: Royal Society of Chemistry journal article supplement (doi:10.1039/c2cs35253b), 2012-09-12

# **Jahn-Teller Distortions in Transition Metal Compounds, and their Importance in Functional Molecular and Inorganic Materials**

Malcolm A. Halcrow

*School of Chemistry, University of Leeds, Woodhouse Lane, Leeds LS2 9JT, UK  
m.a.halcrow@leeds.ac.uk*

**Supporting Information**

**Table S1** Six-coordinate copper(II) compounds that have show unusual crystallographic coordination geometries, and the techniques used to demonstrate their true structure as a disordered (pseudo)-Jahn-Teller elongated octahedron. Only compounds for which these additional experiments have been done are included in the table.

|                                                                                                                                                                          | Crystallographic Cu site symmetry and apparent structural distortion from an ideal octahedral geometry | Ref.   | Technique                                                                                                                                                                                         | Ref.                       |
|--------------------------------------------------------------------------------------------------------------------------------------------------------------------------|--------------------------------------------------------------------------------------------------------|--------|---------------------------------------------------------------------------------------------------------------------------------------------------------------------------------------------------|----------------------------|
| $\alpha$ -M <sub>2</sub> Pb[Cu(NO <sub>2</sub> ) <sub>6</sub> ]<br>(M <sup>+</sup> = K <sup>+</sup> , Rb <sup>+</sup> , Cs <sup>+</sup> , Tl <sup>+</sup> ) <sup>a</sup> | T <sub>h</sub> , undistorted                                                                           | 1-3    | TLS analysis<br>VT powder and single crystal EPR<br>EXAFS                                                                                                                                         | 4<br>5<br>6                |
| $\beta$ -M <sub>2</sub> Pb[Cu(NO <sub>2</sub> ) <sub>6</sub> ]<br>(M <sup>+</sup> = K <sup>+</sup> , Rb <sup>+</sup> , Cs <sup>+</sup> , Tl <sup>+</sup> ) <sup>a</sup>  | D <sub>2h</sub> , tetragonal compression                                                               | 4, 7-9 | TLS analysis<br>VT powder and single crystal EPR<br>Single crystal UV/vis<br>EXAFS                                                                                                                | 4<br>5, 10-12<br>12<br>6   |
| K <sub>2</sub> CuF <sub>4</sub>                                                                                                                                          | D <sub>4h</sub> , tetragonal compression                                                               | 14     | UV/vis and MCD measurements<br>Susceptibility measurements<br>Correction of incorrect space group                                                                                                 | 15<br>16<br>17             |
| $\gamma$ -Cu <sub>2</sub> (OH) <sub>3</sub> Cl, [Cu( $\mu_3$ -OH) <sub>6</sub> ] site                                                                                    | C <sub>i</sub> , tetragonal compression                                                                | 18     | Reformulation of compound as<br>Cu <sub>3</sub> (Cu <sub>1-x</sub> Zn <sub>x</sub> )(OH) <sub>6</sub> Cl <sub>2</sub> (x > 0.5)                                                                   | 19                         |
| [NH <sub>4</sub> ] <sub>2</sub> [Cu(OH <sub>2</sub> ) <sub>6</sub> ][SO <sub>4</sub> ] <sub>2</sub>                                                                      | C <sub>i</sub> , small rhombic elongation                                                              | 20     | VT crystallography<br>VT powder and single crystal EPR<br>Comparative UV/vis and EPR spectra<br>of other M <sub>2</sub> [Cu(OH <sub>2</sub> ) <sub>6</sub> ][SO <sub>4</sub> ] <sub>2</sub> salts | 21-24<br>21, 23<br>25, 26  |
| [Cu(pyO) <sub>6</sub> ]X <sub>2</sub> (X <sup>-</sup> = BF <sub>4</sub> <sup>-</sup> , ClO <sub>4</sub> <sup>-</sup> , NO <sub>3</sub> <sup>-</sup> ) <sup>b</sup>       | S <sub>6</sub> , trigonal distortion                                                                   | 27-30  | VT crystallography<br>VT powder and single crystal EPR<br>EXAFS                                                                                                                                   | 30<br>29, 31<br>32         |
| [Cu(en) <sub>3</sub> ]SO <sub>4</sub>                                                                                                                                    | D <sub>3</sub> , trigonal distortion                                                                   | 34     | VT powder and single crystal EPR<br>EXAFS<br>VT crystallography                                                                                                                                   | 35<br>6<br>36              |
| [Cu(dien) <sub>2</sub> ][NO <sub>3</sub> ] <sub>2</sub> <sup>c</sup>                                                                                                     | C <sub>1</sub> , rhombical compression                                                                 | 37     | VT crystallography and TLS analysis<br>Single crystal UV/vis and EPR                                                                                                                              | 38<br>39                   |
| [Cu(terpy) <sub>2</sub> ]Br <sub>2</sub> ·3H <sub>2</sub> O, high-T phase <sup>d</sup>                                                                                   | C <sub>1</sub> , rhombic compression                                                                   | 42     | VT powder and single crystal EPR                                                                                                                                                                  | 42, 43                     |
| [Cu(terpy) <sub>2</sub> ][PF <sub>6</sub> ] <sub>2</sub> , high-T phase <sup>d</sup>                                                                                     | S <sub>4</sub> , tetragonal compression                                                                | 44     | VT powder and single crystal EPR                                                                                                                                                                  | 42                         |
| [Cu(terpy) <sub>2</sub> ][BF <sub>4</sub> ] <sub>2</sub> <sup>d</sup>                                                                                                    | C <sub>1</sub> , rhombic compression                                                                   | 45     | TLS analysis and VT powder EPR                                                                                                                                                                    | 45                         |
| [Cu(1,1''-dioxoterypy) <sub>2</sub> ][ClO <sub>4</sub> ] <sub>2</sub>                                                                                                    | S <sub>4</sub> , tetragonal compression                                                                | 47     | TLS analysis                                                                                                                                                                                      | 47                         |
| [Cu(1-bpp) <sub>2</sub> ][BF <sub>4</sub> ] <sub>2</sub>                                                                                                                 | C <sub>1</sub> , small rhombic elongation                                                              | 48     | VT crystallography and TLS analysis<br>VT powder and single crystal EPR                                                                                                                           | 49-51<br>50                |
| $\beta$ -[Cu(1-bpp <sup>Mes</sup> ) <sub>2</sub> ][ClO <sub>4</sub> ] <sub>2</sub> ·2CH <sub>3</sub> NO <sub>2</sub>                                                     | C <sub>1</sub> , small rhombic elongation                                                              | 52     | TLS analysis and VT powder EPR                                                                                                                                                                    | 52                         |
| [Cu( $\mu_3$ -btz) <sub>6</sub> (Cu{CNrBu}) <sub>4</sub> ]                                                                                                               | S <sub>4</sub> , tetragonal compression                                                                | 53     | VT powder EPR                                                                                                                                                                                     | 53                         |
| [Cu(tach) <sub>2</sub> ][NO <sub>3</sub> ] <sub>2</sub> <sup>e</sup>                                                                                                     | C <sub>2h</sub> , small tetragonal compression                                                         | 54     | VT powder and single crystal EPR                                                                                                                                                                  | 54                         |
| [Cu(thch) <sub>2</sub> ][CH <sub>3</sub> C <sub>6</sub> H <sub>4</sub> SO <sub>3</sub> -4] <sub>2</sub>                                                                  | C <sub>i</sub> , rhombic compression                                                                   | 55     | VT crystallography                                                                                                                                                                                | 55                         |
| [H <sub>3</sub> NC <sub>6</sub> H <sub>4</sub> Cl-3] <sub>8</sub> [CuCl <sub>6</sub> ]Cl <sub>4</sub>                                                                    | C <sub>i</sub> , tetragonal compression                                                                | 56     | VT crystallography<br>EXAFS<br>VT powder and single crystal EPR<br>Single crystal UV/vis<br>EPR of Cu-doped Cd(II) analogue                                                                       | 57<br>58<br>59<br>59<br>60 |
| [Cu(ompa) <sub>3</sub> ][ClO <sub>4</sub> ] <sub>2</sub>                                                                                                                 | D <sub>3</sub> , trigonal distortion                                                                   | 61     | VT powder EPR<br>Single crystal EPR                                                                                                                                                               | 62<br>63                   |
| <i>trans</i> -[Cu(O <sub>2</sub> CCH <sub>2</sub> OCH <sub>3</sub> ) <sub>2</sub> (OH) <sub>2</sub> ]                                                                    | C <sub>i</sub> , rhombic compression                                                                   | 64     | VT crystallography                                                                                                                                                                                | 65                         |
| [Cu(HC{PPh <sub>2</sub> O} <sub>3</sub> ) <sub>2</sub> ][ClO <sub>4</sub> ] <sub>2</sub>                                                                                 | C <sub>i</sub> , tetragonal compression                                                                | 66     | EXAFS<br>VT crystallography and powder EPR                                                                                                                                                        | 67<br>68                   |
| <i>cis</i> -[Cu(vanillinate)(OH) <sub>2</sub> ]                                                                                                                          | C <sub>2v</sub> , tetragonal compression                                                               | 69     | VT crystallography and TLS analysis                                                                                                                                                               | 70                         |
| <i>trans</i> -[Cu(O <sub>2</sub> NO) <sub>2</sub> (tmbim) <sub>2</sub> ]                                                                                                 | C <sub>i</sub> , rhombic compression                                                                   | 71     | TLS analysis                                                                                                                                                                                      | 71                         |
| [Cu([9]aneS <sub>3</sub> ) <sub>2</sub> ][BF <sub>4</sub> ] <sub>2</sub>                                                                                                 | C <sub>i</sub> , small tetragonal elongation                                                           | 72     | VT crystallography<br>VT powder EPR and powder UV/vis<br>EPR of Cu-doped Fe(II) analogue                                                                                                          | 73<br>73, 74<br>73         |

Table S1 continued.

|                                                                                                                            | Crystallographic Cu site symmetry and apparent structural distortion from an ideal octahedral geometry | Ref. | Technique                                                               | Ref.               |
|----------------------------------------------------------------------------------------------------------------------------|--------------------------------------------------------------------------------------------------------|------|-------------------------------------------------------------------------|--------------------|
| [Cu([9]aneN <sub>3</sub> ) <sub>2</sub> ][Cu(CN) <sub>3</sub> ].2H <sub>2</sub> O <sup>f</sup>                             | C <sub>1</sub> , small rhombic elongation                                                              | 752  | VT crystallography<br>VT powder and single crystal EPR<br>Powder UV/vis | 75<br>74, 75<br>74 |
| [Cu(MeTRI) <sub>2</sub> ][BF <sub>4</sub> ] <sub>2</sub>                                                                   | D <sub>3</sub> , trigonal distortion                                                                   | 78   | TLS analysis                                                            | 78                 |
| [Cu(NMe <sub>3</sub> sar)][ClO <sub>4</sub> ] <sub>4</sub>                                                                 | S <sub>6</sub> , trigonal distortion                                                                   | 79   | VT powder EPR<br>EPR of Cu-doped Zn analogue                            | 79<br>79           |
| <i>cis</i> -[Cu(ONO)(bipy) <sub>2</sub> ]NO <sub>3</sub> <sup>g</sup>                                                      | C <sub>1</sub> , small rhombic elongation                                                              | 80   | VT crystallography                                                      | 80                 |
| <i>cis</i> -[Cu(hat) <sub>2</sub> (OH <sub>2</sub> ) <sub>2</sub> ][ClO <sub>4</sub> ] <sub>2</sub>                        |                                                                                                        |      | VT powder EPR                                                           | 82                 |
| [Cu(μ-dpp)(OH <sub>2</sub> ) <sub>2</sub> ] <sub>n</sub> [BF <sub>4</sub> ] <sub>2n</sub> .2nH <sub>2</sub> O <sup>h</sup> | C <sub>1</sub> , small rhombic elongation                                                              | 83   | VT crystallography                                                      | 83                 |
| [CuTp <sub>2</sub> ] (molecule B) <sup>i</sup>                                                                             | C <sub>i</sub> , small rhombic elongation                                                              | 85   | TLS analysis<br>VT crystallography and powder EPR                       | 85, 86<br>86       |
| [Cu(tpm) <sub>2</sub> ][NO <sub>3</sub> ] <sub>2</sub>                                                                     | C <sub>3v</sub> , trigonal distortion                                                                  | 87   | EXAFS                                                                   | 87                 |
| [Cu(tpp) <sub>2</sub> ]Br <sub>2</sub> .8H <sub>2</sub> O                                                                  | C <sub>i</sub> , tetragonal compression                                                                | 88   | VT powder and single crystal EPR                                        | 88                 |

<sup>a</sup>The γ-phase of the same compounds exhibits a crystallographically ordered rhombically elongated octahedral Cu(II) centre.<sup>13</sup> <sup>b</sup>The solvated forms of these materials, [Cu(pyO)<sub>6</sub>][NO<sub>3</sub>]<sub>2</sub>.2H<sub>2</sub>O has a typical, static Jahn-Teller elongated geometry at 293 K.<sup>33</sup> <sup>c</sup>The salts [Cu(dien)<sub>2</sub>]Br<sub>2</sub><sup>40</sup> and [Cu(dien)<sub>2</sub>]Cl[ClO<sub>4</sub>]<sup>41</sup> have a typical, static pseudo-Jahn-Teller elongated geometry at 293 K. <sup>d</sup>The salt [Cu(terpy)<sub>2</sub>][NO<sub>3</sub>]<sub>2</sub> has a typical, static pseudo-Jahn-Teller elongated geometry at 298 K.<sup>46</sup> <sup>e</sup>The salt [Cu(tach)<sub>2</sub>][ClO<sub>4</sub>]<sub>2</sub> has a typical, static Jahn-Teller elongated geometry at 293 K.<sup>52</sup> <sup>f</sup>The salts [Cu([9]aneN<sub>3</sub>)<sub>2</sub>][ClO<sub>4</sub>]<sub>2</sub><sup>76</sup> and [Cu([9]aneN<sub>3</sub>)<sub>2</sub>]Cl<sub>2</sub><sup>77</sup> have a very similar, small rhombic elongated geometry at 293 K and so are also probably disordered although this was not studied. In contrast, [Cu([9]aneN<sub>3</sub>)<sub>2</sub>][CF<sub>3</sub>SO<sub>4</sub>]<sub>2</sub>.H<sub>2</sub>O has a static Jahn-Teller elongation in the crystal.<sup>77</sup> <sup>g</sup>Several other fluxional complexes of type [Cu(X)(bipy)<sub>2</sub>]Y, [Cu(X)(phen)<sub>2</sub>]Y or [Cu(X)(bipyam)<sub>2</sub>]Y (X<sup>-</sup> = NO<sub>2</sub><sup>-</sup> or MeCO<sub>2</sub><sup>-</sup>; Y<sup>-</sup> = NO<sub>3</sub><sup>-</sup>, BF<sub>4</sub><sup>-</sup>, ClO<sub>4</sub><sup>-</sup>, PF<sub>6</sub><sup>-</sup> etc.) have also been studied by VT crystallography.<sup>81</sup> <sup>h</sup>The isomorphous ClO<sub>4</sub><sup>-</sup> salt of the same compound also probably contains fluxional Cu centres, although this was not studied.<sup>84</sup> <sup>i</sup>There are two independent molecules in the crystal structure of this compound. The other molecule has a static Jahn-Teller elongated structure.

1. D. L. Cullen and E. C. Lingafelter, *Inorg. Chem.*, 1971, **10**, 1264.
2. S. Takagi, M. D. Joesten and P. G. Lehner, *Acta Cryst., Sect. B*, 1976, **32**, 326.
3. S. Klein and D. Reinen, *J. Solid State Chem.*, 1978, **25**, 295.
4. M. D. Joesten, S. Takagi and P. G. Lenhert, *Inorg. Chem.*, 1977, **16**, 2681.
5. C. Friebel, *Z. Anorg. Allg. Chem.*, 1975, **417**, 197.
6. F. Villain, M. Verdagner and Y. Dromzee, *J. Phys. IV*, 1997, **7**, 659.
7. S. Takagi, M. D. Joesten and P. G. Lenhert, *J. Am. Chem. Soc.*, 1975, **97**, 444; S. Takagi, M. D. Joesten and P. G. Lenhert, *Acta Crystallogr., Sect. B*, 1976, **32**, 1278.
8. R. Helmbold, D. Mullen, H. Ahsbahs, A. Klopsch, E. Hellner and G. Heger, *Z. Kristallogr.*, 1976, **143**, 220.
9. D. Mullen, G. Heger and D. Reinen, *Solid State Commun.*, 1975, **17**, 1249.
10. B. V. Harrowfield and J. R. Pilbrow, *J. Phys. C*, 1973, **6**, 755.
11. M. D. Joesten, S. Takagi and J. H. Venable jr., *Chem. Phys. Lett.*, 1975, **36**, 536.
12. D. Reinen, C. Friebel and K. P. Reetz, *J. Solid State Chem.*, 1972, **4**, 103.
13. S. Klein and D. Reinen, *J. Solid State Chem.*, 1980, **32**, 311.
14. K. Knox, *J. Chem. Phys.*, 1959, **30**, 991.
15. D. I. Khomskii and I. Kugel, *Solid State Commun.*, 1973, **13**, 763.
16. W. Kleeman and Y. Farge, *J. Phys.*, 1975, **36**, 1293; J. Ferre, M. Regis, Y. Farge and W. Kleemann, *Physica B+C*, 1977, **89**, 181; J. Ferre, M. Regis, Y. Farge and W. Kleemann, *J. Phys. C*, 1979, **12**, 2671.
17. R. Haegele and D. Babel, *Z. Anorg. Allg. Chem.*, 1974, **409**, 11; E. Herdtweck and D. Babel, *Z. Anorg. Allg. Chem.*, 1981, **474**, 113; D. Reinen and S. Krause, *Inorg. Chem.*, 1981, **20**, 2750.
18. M. E. Fleet, *Acta Cryst., Sect. B*, 1975, **31**, 183.
19. J. D. Grice, J. T. Szymanski and J. L. Jambor, *Canad. Mineral.*, 1996, **34**, 73.
20. H. Montgomery and E. C. Lingafelter, *Acta Crystallogr.*, 1966, **20**, 659; G. M. Brown and R. Chidambaram, *Acta Crystallogr., Sect. B*, 1969, **25**, 676.
21. N. W. Alcock, M. Duggan, A. Murray, S. Tyagi, B. J. Hathaway and A. Hewat, *J. Chem. Soc., Dalton Trans.*, 1984, **7**.
22. B. J. Hathaway and A. W. Hewat, *J. Solid State Chem.*, 1984, **51**, 364.
23. M. A. Hitchman, W. Maaskant, J. van der Plas, C. J. Simmons and H. Strateimer, *J. Am. Chem. Soc.*, 1999, **121**, 1488.
24. B. N. Figgis, A. N. Soblelev, C. J. Simmons, M. A. Hitchman, H. Strateimer and M. J. Riley, *Acta Cryst., Sect. B*, 2000, **56**, 438.
25. M. A. Hitchman and T. D. Waite, *Inorg. Chem.*, 1976, **15**, 2150.
26. T. D. Waite and M. A. Hitchman, *Inorg. Chem.*, 1976, **15**, 2155.
27. C. J. O'Connor, E. Sinn and R. L. Carlin, *Inorg. Chem.*, 1977, **16**, 3314.
28. D. Taylor, *Aust. J. Chem.*, 1978, **31**, 713.
29. J. S. Wood, C. P. Keijzers, E. de Boer and A. Buttafava, *Inorg. Chem.*, 1980, **19**, 2213.
30. C. P. Keijzers, R. K. McMullan, J. S. Wood, G. van Kalkeren, R. Srinivasan and E. de Boer, *Inorg. Chem.*, 1982, **21**, 4275.
31. D. Reinen and S. Krause, *Solid State Commun.*, 1979, **29**, 691.
32. J. S. Wood, C. P. Keijzers and R. O. Day, *Acta Cryst., Sect. C*, 1984, **40**, 404.
33. I. Persson, P. Persson, M. Sandström and A.-S. Ullström, *J. Chem. Soc., Dalton Trans.*, 2002, 1256.
34. D. L. Cullen and E. C. Lingafelter, *Inorg. Chem.*, 1970, **9**, 1858.
35. I. Bertini, D. Gatteschi and A. Scozzafava, *Inorg. Chim. Acta*, 1974, **11**, L17; I. Bertini, D. Gatteschi and A. Scozzafava, *Inorg. Chem.*, 1977, **26**, 1973.
36. M. Lutz, *Acta Cryst., Sect. C*, 2010, **66**, m330; S. Smeets, P. Parois, H.-B. Bürgi and M. Lutz, *Acta Cryst., Sect. B*, 2011, **67**, 53.
37. F. S. Stephens, *J. Chem. Soc. A*, 1969, 883.
38. A. Murphy, J. Mullane and B. Hathaway, *Inorg. Nucl. Chem. Lett.*, 1980, **16**, 129.
39. B. J. Hathaway, M. J. Bew and D. E. Billing, *J. Chem. Soc. A*, 1970, 1090.
40. F. S. Stephens, *J. Chem. Soc. A*, 1969, 2233.
41. M. Duggan, B. J. Hathaway and J. Mullane, *J. Chem. Soc., Dalton Trans.*, 1980, 690.
42. J.-V. Folgado, W. Henke, R. Allmann, H. Strateimer, D. Beltrán-Porter, T. Rojo and D. Reinen, *Inorg. Chem.*, 1990, **29**, 2035.
43. W. Henke and D. Reinen, *Z. Anorg. Allg. Chem.*, 1977, **436**, 187.
44. M. I. Arriortua, T. Rojo, J. M. Amigo, G. Germain and J. P. Declercq, *Acta Cryst., Sect. B*, 1982, **38**, 1323.
45. R. Docherty, F. Tuna, C. A. Kilner, E. J. L. McInnes and M. A. Halcrow, *Chem. Commun.*, 2012, **48**, 4055.
46. R. Allmann, W. Henke and D. Reinen, *Inorg. Chem.*, 1978, **17**, 378.
47. A. J. Amoroso, M. W. Burrows, S. J. Coles, R. Haigh, R. D. Farley, M. B. Hursthouse, M. Jones, K. M. A. Malik and D. M. Murphy, *Dalton Trans.*, 2008, 506.
48. N. K. Solanki, E. J. L. McInnes, F. E. Mabbs, S. Radojevic, M. McPartlin, N. Feeder, J. E. Davies and M. A. Halcrow, *Angew. Chem., Int. Ed.*, 1998, **37**, 2221.
49. M. A. Leech, N. K. Solanki, M. A. Halcrow, J. A. K. Howard and S. Dahaoui, *Chem. Commun.*, 1999, 2245.
50. N. K. Solanki, M. A. Leech, E. J. L. McInnes, F. E. Mabbs, J. A. K. Howard, C. A. Kilner, J. M. Rawson and M. A. Halcrow, *J. Chem. Soc., Dalton Trans.*, 2002, 1295.
51. G. S. Beddard, M. A. Halcrow, M. A. Hitchman, M. P. de Miranda, C. J. Simmons and H. Strateimer, *Dalton Trans.*, 2003, 1028.
52. N. K. Solanki, M. A. Leech, E. J. L. McInnes, J. P. Zhao, F. E. Mabbs, N. Feeder, J. A. K. Howard, J. E. Davies, J. M. Rawson and M. A. Halcrow, *J. Chem. Soc., Dalton Trans.*, 2001, 2083.
53. G. F. Kokoszka, J. Baranowski, C. Goldstein, J. Orsini, A. D. Mighell, V. I. Himes and A. R. Siedle, *J. Am. Chem. Soc.*, 1983, **105**, 5627.
54. J. H. Ammeter, H. B. Bürgi, E. Gamp, V. Meyer-Sandrin and W. P. Jensen, *Inorg. Chem.*, 1979, **18**, 733.
55. J. Bebenorf, H.-B. Bürgi, E. Gamp, M. A. Hitchman, A. Murphy, D. Reinen, M. J. Riley and H. Strateimer, *Inorg. Chem.*, 1996, **35**, 7419.
56. D. A. Tucker, P. S. White, K. L. Trojan, M. L. Kirk and W. E. Hatfield, *Inorg. Chem.*, 1991, **30**, 823.
57. M. Wei and R. D. Willett, *Inorg. Chem.*, 1995, **34**, 3780.
58. P. J. Ellis, H. C. Freeman, M. A. Hitchman, D. Reinen and B. Wagner, *Inorg. Chem.*, 1994, **33**, 1249.
59. H. Strateimer, B. Wagner, E. R. Krausz, R. Linder, H.-H. Schmidke, J. Pebler, W. E. Hatfield, L. ten Haar, D. Reinen and M. A. Hitchman, *Inorg. Chem.*, 1994, **33**, 2320.
60. B. Wagner, S. A. Warda, M. A. Hitchman and D. Reinen, *Inorg. Chem.*, 1996, **35**, 3967.
61. M. D. Joesten, M. S. Hussain and P. G. Lenhert, *Inorg. Chem.*, 1970, **9**, 151.
62. M. D. Joesten, R. C. Koch, T. W. Martin and J. H. Venable jr, *J. Am. Chem. Soc.*, 1971, **93**, 1138.
63. R. C. Koch, M. D. Joesten and J. H. Venable jr, *J. Chem. Phys.*, 1973, **59**, 6312.
64. C. K. Prout, R. A. Armstrong, J. R. Carruthers, J. G. Forrest, P. Murray-Rust and F. J. C. Rossotti, *J. Chem. Soc. A*, 1968, 2791.
65. K. Prout, A. Edwards, V. Mtetwa, J. Murray, J. F. Saunders and F. J. C. Rossotti, *Inorg. Chem.*, 1997, **36**, 2820; C. J. Simmons, H. Strateimer, M. A. Hitchman, D. Reinen, V. M. Masters and M. J. Riley, *Inorg. Chem.*, 2011, **50**, 4900.
66. S.-J. Shieh, C.-M. Che and S.-M. Peng, *Inorg. Chim. Acta*, 1992, **192**, 151.
67. V. M. Masters, M. J. Riley, M. A. Hitchman and C. Simmons, *Inorg. Chem.*, 2001, **40**, 4478.
68. C. J. Simmons, H. Strateimer, G. R. Hanson and M. A. Hitchman, *Inorg. Chem.*, 2005, **44**, 2753.
69. B. Kozlevčar, M. Humar, P. Strauch and I. Leban, *Z. Naturforsch., Teil B*, 2005, **60**, 1273.
70. B. Kozlevčar, A. Golobič and P. Strauch, *Polyhedron*, 2006, **25**, 2824.
71. M. F. Belicchi, G. V. Gasparri, C. Pelizzi and P. Tarasconi, *Transition Met. Chem.*, 1985, **10**, 295.
72. W. N. Setzer, C. A. Ogle, G. S. Wilson and R. S. Glass, *Inorg. Chem.*, 1983, **22**, 266.
73. R. S. Glass, L. K. Steffen, D. D. Swanson, G. S. Wilson, R. de Gelder, R. A. G. de Graaf and J. Reedijk, *Inorg. Chim. Acta*, 1993, **207**, 241.
74. D. Reinen, A. Ozarowski, B. Jakob, J. Pebler, H. Strateimer, K. Wiegardt and I. Tolksdorf, *Inorg. Chem.*, 1987, **26**, 4010.
75. P. Chaudhuri, K. Oder, K. Wiegardt, J. Weiss, J. Reedijk, W. Hinrich, J. Wood, A. Ozarowski, H. Strateimer and D. Reinen, *Inorg. Chem.*, 1986, **25**, 2951.
76. A. D. Beveridge, A. J. Lavery, M. D. Walkinshaw and M. Schröder, *J. Chem. Soc., Dalton Trans.*, 1987, 373.
77. M. Kavana, D. R. Powell and J. N. Burstyn, *Inorg. Chim. Acta*, 2000, **297**, 351.
78. R. I. Sheldon, A. J. Ciritano, M. A. Beno, J. M. Williams and K. B. Mertes, *J. Am. Chem. Soc.*, 1983, **105**, 3028.
79. P. V. Bernhardt, R. Bramley, L. M. Engelhardt, J. M. Harrowfield, D. C. R. Hockless, B. R. Korybut-

- Daszkiewicz, E. R. Krausz, T. Morgan, A. M. Sargeson, B. W. Skelton and A. H. White, *Inorg. Chem.*, 1995, **34**, 3589.
80. C. J. Simmons, B. J. Hathaway, K. Amornjarusiri, B. D. Santarsiero and A. Clearfield, *J. Am. Chem. Soc.*, 1987, **109**, 1947.
81. C. J. Simmons, *New J. Chem.*, 1993, **17**, 77.
82. H. Grove, J. Sletten, M. Julve, F. Lloret, L. Lezama, J. Carranza, S. Parsons and P. Rillema, *J. Mol. Struct.*, 2002, **606**, 253.
83. H. Grove, J. Sletten, M. Julve, F. Lloret and L. Lezama, *Inorg. Chim. Acta*, 2000, **310**, 217.
84. L. W. Morgan, K. V. Goodwin, W. T. Pennington and J. D. Peterson, *Inorg. Chem.*, 1992, **31**, 1103.
85. A. Murphy, B. J. Hathaway and T. J. King, *J. Chem. Soc., Dalton Trans.*, 1979, 1646.
86. C. A. Kilner, E. J. L. McInnes, M. A. Leech, G. S. Beddard, J. A. K. Howard, F. E. Mabbs, D. Collison, A. J. Bridgeman and M. A. Halcrow, *Dalton Trans.*, 2004, 236.
87. T. Astley, P. J. Ellis, H. C. Freeman, M. A. Hitchman, F. R. Keene, E. R. T. Tiekink, *J. Chem. Soc., Dalton Trans.*, 1995, 595.
88. T. Astley, H. Headlam, M. A. Hitchman, F. R. Keene, J. Pilbrow, H. Stratemeier, E. R. T. Tiekink and Y. C. Zhong, *J. Chem. Soc., Dalton Trans.*, 1995, 3809.

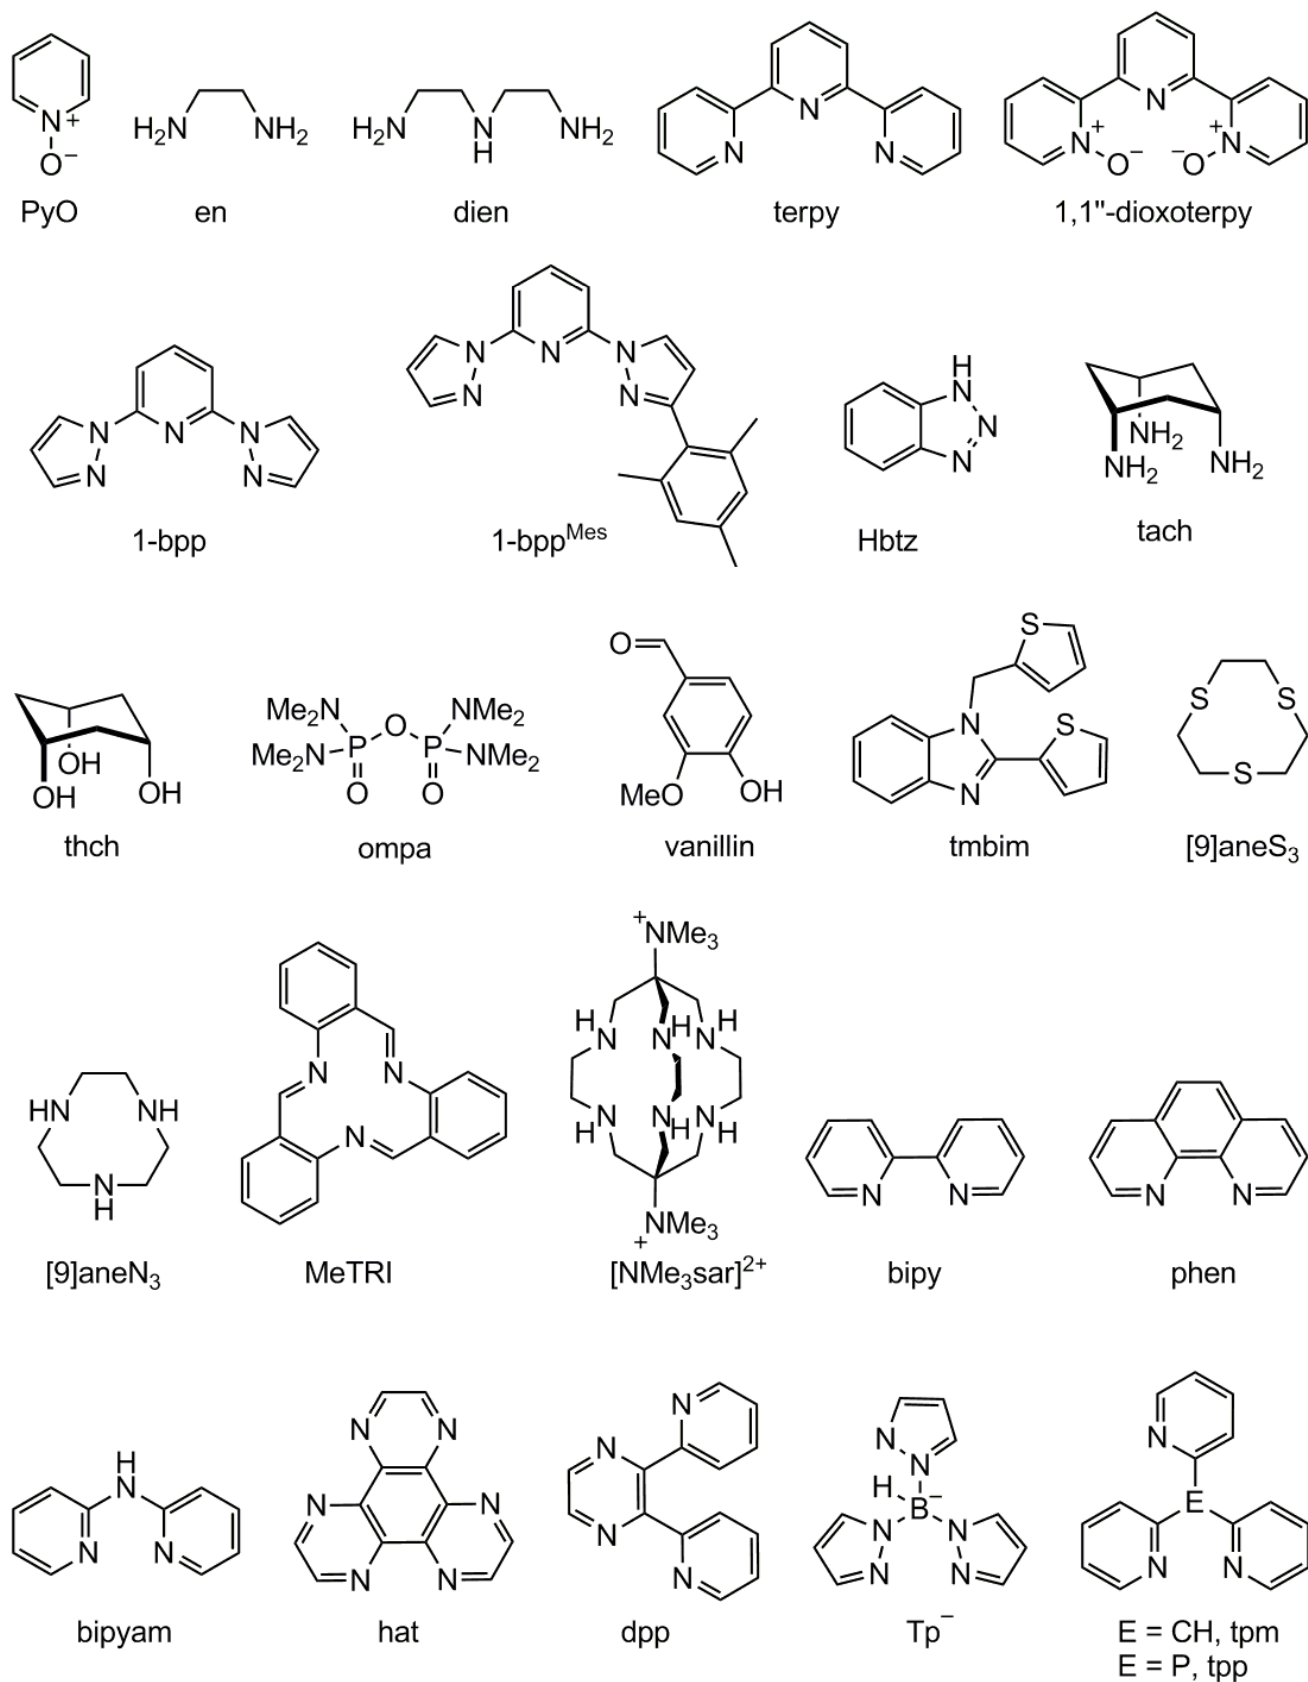

Supplement: c2cs35253b.pdf [file c2cs35253b.pdf]
